# Supplementary material for: Probing Iceland's Dust-Emitting Sediments: Particle Size Distribution, Mineralogy, Cohesion, Fe Mode of Occurrence, and Reflectance Spectra Signatures
Source: Copernicus journal article supplement (doi:10.5194/egusphere-2024-157), 2024-01-22
Supplement: Supplementary file 1 [file egusphere-2024-157-supplement.pdf]

## Supplementary material

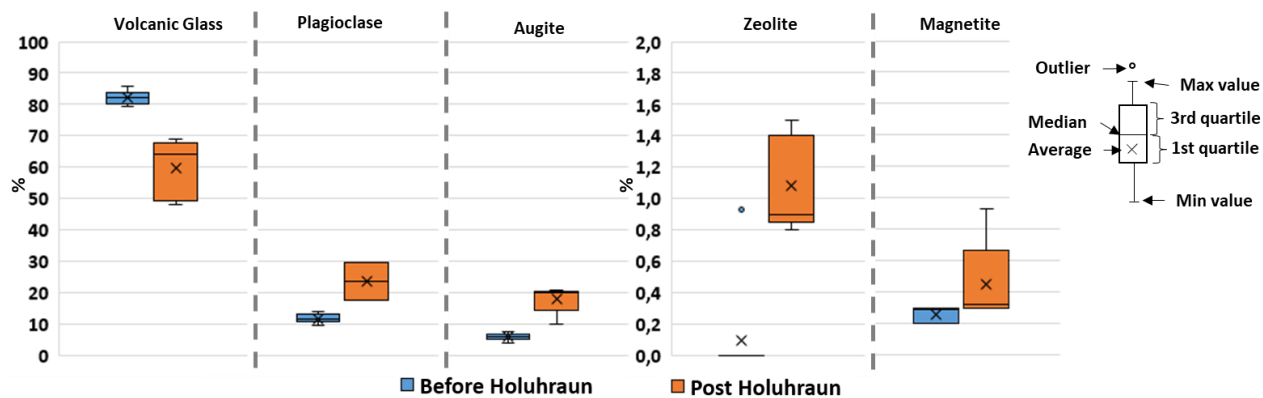

**Figure S1.** Weight in mass % contents of volcanic glass and crystalline mineral species in crust samples from the Jökulsá á Fjöllum basin pre- and post-Holuhraun field lava (natural dam).

25 **Table S1.** Wavelengths used in calculation of band depths for spectral features used to analyze visible-shortwave  
26 infrared spectra measured in the field, using formula  $1-R/R_c$ , where R is the reflectance value at the center  
27 wavelength and  $R_c$  is the value of a continuum at the center wavelength calculated as a straight line between  
28 the given points. All values used in the calculations are the mean of five consecutive bands centered around the  
29 given wavelength.

| Band depth | Center wavelength (nm) | Left continuum (nm) | Right continuum (nm) | Description                            |
|------------|------------------------|---------------------|----------------------|----------------------------------------|
| BD1035     | 1035                   | 710                 | 1575                 | Electronic transition due to $Fe^{2+}$ |
| BD1920     | 1920                   | 1840                | 2140                 | H <sub>2</sub> O combination band      |
| BD2210     | 2210                   | 2150                | 2345                 | Si-OH or Al-OH combination band        |

30

31

32 **Table S2.** Mineral contents (%wt) of samples from the Jökulsá á Fjöllum basin. *R.S.C is the Random Sampling*  
 33 *Composite sample, obtained after mixing an equal batch of each type of sample.* The contents are in % of mass.  
 34 V. G.: volcanic glass, An: anorthite, And: andesine, Agt: augite, Mag: magnetite, M-Ca: mordenite-Ca, Anl:  
 35 analcime. C: crust, S: underlying fluvial sediment, R: eolian ripple, Av.C: Average of the crusts, Av.S: Average of the  
 36 fluvial sediments, Av.R: Average of the Ripples.

| Latitude | Longitude | Sample number | Type | Plagioclase |      |      | Pyroxene | Zeolites |      |      | Distance to Glacier (km) |
|----------|-----------|---------------|------|-------------|------|------|----------|----------|------|------|--------------------------|
|          |           |               |      | V. G.       | An   | And  |          | Agt      | Mag  | M-Ca |                          |
| 64,91    | -16,78    | 1             | C    | 79          | 13   | <0.1 | 7.4      | <0.5     | <0.1 | <0.1 | 16.0                     |
| 64,91    | -16,78    | 2             | C    | 86          | 9.8  | <0.1 | 4.0      | <0.5     | <0.1 | <0.1 | 15.5                     |
| 64,84    | -16,98    | 9             | C    | 83          | 11   | <0.1 | 5.4      | <0.5     | <0.1 | <0.1 | 2.0                      |
| 64,89    | -16,88    | 12            | C    | 83          | 11   | <0.1 | 5.8      | <0.5     | <0.1 | <0.1 | 9.5                      |
| 64,91    | -16,83    | 14            | C    | 85          | 9.6  | <0.1 | 5.5      | <0.5     | <0.1 | <0.1 | 13.0                     |
| 64,91    | -16,77    | 15            | C    | 83          | 12   | <0.1 | 5.0      | <0.5     | <0.1 | <0.1 | 16.0                     |
| 65,23    | -16,19    | 26            | C    | 69          | 18   | <0.1 | 9.9      | 0.93     | <0.1 | 0.90 | 72.5                     |
| 65,26    | -16,12    | 27            | C    | 48          | 30   | <0.1 | 21       | <0.5     | <0.1 | 0.90 | 76.5                     |
| 64,91    | -16,77    | 29            | C    | 80          | 13   | <0.1 | 6.0      | <0.5     | <0.1 | <0.1 | 15.5                     |
| 64,91    | -16,77    | 30            | C    | 79          | 14   | <0.1 | 6.6      | <0.5     | <0.1 | <0.1 | 15.5                     |
| 64,91    | -16,77    | 31            | C    | 82          | 11   | <0.1 | 6.7      | <0.5     | <0.1 | <0.1 | 15.5                     |
| 66,03    | -16,44    | 109           | C    | 64          | <0.1 | 14   | 20       | <0.5     | 0.80 | <0.1 | 176.0                    |
| 66,09    | -16,48    | 110           | C    | 66          | <0.1 | 13   | 19       | <0.5     | 1.0  | 0.50 | 183.0                    |
| 66,18    | -16,51    | 111           | C    | 51          | <0.1 | 28   | 20       | <0.5     | 0.60 | 0.70 | 194.0                    |
| 64,92    | -16,78    | R.S.C         | C    | 82          | 12   | <0.1 | 5.9      | <0.5     | <0.1 | 0.93 | 15.5                     |
| 64,91    | -16,78    | 3             | S    | 83          | 11   | <0.1 | 5.4      | <0.5     | <0.1 | <0.1 | 15.5                     |
| 64,89    | -16,88    | 13            | S    | 88          | 7.4  | <0.1 | 4.0      | <0.5     | <0.1 | <0.1 | 9.5                      |
| 64,91    | -16,77    | 16            | S    | 89          | 7.7  | <0.1 | 3.5      | <0.5     | <0.1 | <0.1 | 16.0                     |
| 65,23    | -16,19    | 25            | S    | 76          | 16   | <0.1 | 7.3      | 0.60     | <0.1 | <0.1 | 72.5                     |
| 65,26    | -16,12    | 28            | S    | 51          | 31   | <0.1 | 16       | <0.5     | <0.1 | 1.0  | 77.5                     |
| 64,91    | -16,77    | 32            | S    | 83          | 11   | <0.1 | 6.2      | <0.5     | <0.1 | <0.1 | 16.0                     |
| 64,91    | -16,77    | 33            | S    | 84          | 10   | <0.1 | 5.4      | <0.5     | <0.1 | <0.1 | 16.0                     |
| 64,92    | -16,78    | R.S.C         | S    | 85          | 9.6  | <0.1 | 4.9      | <0.5     | <0.1 | 0.84 | 15.5                     |
| 64,83    | -17,01    | 4             | R    | 90          | 6.4  | <0.1 | 3.4      | <0.5     | <0.1 | <0.1 | 1.0                      |

|       |        |    |       |            |             |             |             |      |               |               |      |
|-------|--------|----|-------|------------|-------------|-------------|-------------|------|---------------|---------------|------|
| 64,83 | -17,01 | 6  | R     | 90         | 6.6         | <0.1        | 3.5         | <0.5 | <0.1          | <0.1          | 1.0  |
| 64,84 | -16,98 | 10 | R     | 88         | 8.7         | <0.1        | 3.6         | <0.5 | <0.1          | <0.1          | 2.0  |
| 64,86 | -16,95 | 11 | R     | 89         | 8.3         | <0.1        | 3.5         | <0.5 | <0.1          | <0.1          | 4.5  |
| 64,91 | -16,77 | 17 | R     | 85         | 10          | <0.1        | 4.5         | <0.5 | <0.1          | <0.1          | 16.0 |
| 64,92 | -16,76 | 18 | R     | 82         | 11          | <0.1        | 6.4         | <0.5 | <0.1          | <0.1          | 16.0 |
| 64,95 | -16,55 | 19 | R     | 76         | 16          | <0.1        | 8.0         | <0.5 | <0.1          | <0.1          | 27.0 |
| 64,91 | -16,77 | 34 | R     | 85         | 10          | <0.1        | 5.3         | <0.5 | <0.1          | <0.1          | 16.0 |
|       |        |    | Av.C. | 75±<br>12  | 11±<br>7.4  | 3.6±8<br>.1 | 9.9±<br>6.4 | <0.5 | 0.16±0<br>.34 | 0.26±<br>0.40 |      |
|       |        |    | Av.S. | 80±<br>12  | 13±<br>7.7  | <0.1        | 6.6±<br>4.0 | <0.5 | <0.1          | 0.23±<br>0.43 |      |
|       |        |    | Av.R. | 86±<br>4.7 | 9.6±<br>2.9 | <0.1        | 4.8±<br>1.7 | <0.5 | <0.1          | <0.1          |      |

37  
38  
39  
40  
41  
42  
43  
44  
45  
46  
47  
48  
49  
50  
51  
52  
53  
54  
55  
56  
57  
58  
59  
60

61 **Table S3.** Mineral contents (%wt) of samples from different locations (Loc.) Dyngjusandur (Dyn), Dyngjuvatn (Dvt), Landeyjarsandur (Lan), Mýrdalssandur (Mýr), Skaftarsandur  
62 (Ska), Mælifellsandur (Mæl) and Hagavatn (Hgv), Average Icelandic crust (Av.I.C.). V. G.: volcanic glass, An: anorthite, And: andesine, Di-Fe: Fe-diopside, Agt: augite, Qtz:  
63 quartz, Fo: forsterite, Hem: hematite, Mag: magnetite, Py: pyrite, M-Ca: mordenite-Ca, Anl: analcime, Wrk: wairakite.

| Latitude | Longitude | Sample number | Loc. | V.G. | Plagioclase |      | Pyroxene |      |      | Iron Oxides |      |      | Zeolites |      |      |      |
|----------|-----------|---------------|------|------|-------------|------|----------|------|------|-------------|------|------|----------|------|------|------|
|          |           |               |      |      | An          | And  | Di-Fe    | Agt  | Qtz  | Fo          | Hem  | Mag  | Py       | M-Ca | Anl  | Wrk  |
| 64,92    | -16,78    | R.S.C.        | Dyn  | 79   | 13          | <0.1 | <0.1     | 7.4  | <0.1 | <0.1        | <0.5 | <0.5 | <0.5     | <0.1 | <0.1 | <0.1 |
| 64,91    | -16,78    | 1             | Dyn  | 86   | 9.8         | <0.1 | <0.1     | 4.0  | <0.1 | <0.1        | <0.5 | <0.5 | <0.5     | <0.1 | <0.1 | <0.1 |
| 64,91    | -16,78    | 2             | Dyn  | 83   | 11          | <0.1 | <0.1     | 5.8  | <0.1 | <0.1        | <0.5 | <0.5 | <0.5     | <0.1 | <0.1 | <0.1 |
| 64,89    | -16,88    | 12            | Dyn  | 85   | 9.6         | <0.1 | <0.1     | 5.5  | <0.1 | <0.1        | <0.5 | <0.5 | <0.5     | <0.1 | <0.1 | <0.1 |
| 64,91    | -16,83    | 14            | Dyn  | 83   | 12          | <0.1 | <0.1     | 5.0  | <0.1 | <0.1        | <0.5 | <0.5 | <0.5     | <0.1 | <0.1 | <0.1 |
| 64,91    | -16,77    | 15            | Dyn  | 82   | 12          | <0.1 | <0.1     | 5.9  | <0.1 | <0.1        | <0.5 | <0.5 | <0.5     | <0.1 | 0.93 | <0.1 |
| 64,91    | -16,77    | 29            | Dyn  | 80   | 13          | <0.1 | <0.1     | 6.0  | <0.1 | <0.1        | <0.5 | <0.5 | <0.5     | <0.1 | <0.1 | <0.1 |
| 64,91    | -16,77    | 30            | Dyn  | 79   | 14          | <0.1 | <0.1     | 6.6  | <0.1 | <0.1        | <0.5 | <0.5 | <0.5     | <0.1 | <0.1 | <0.1 |
| 64,91    | -16,77    | 31            | Dyn  | 82   | 11          | <0.1 | <0.1     | 6.7  | <0.1 | <0.1        | <0.5 | <0.5 | <0.5     | <0.1 | <0.1 | <0.1 |
| 64,98    | -16,57    | 20            | Dvt  | 87   | 8.0         | <0.1 | <0.1     | 5.0  | <0.1 | <0.1        | <0.5 | <0.5 | <0.5     | <0.1 | <0.1 | <0.1 |
| 65,00    | -16,55    | 21            | Dvt  | 92   | 4.4         | <0.1 | <0.1     | 1.4  | <0.1 | <0.1        | <0.5 | <0.1 | <0.5     | <0.1 | 0.70 | <0.1 |
| 63,53    | -12,67    | 92            | Lan  | 35   | 48          | <0.1 | 14       | <0.1 | <0.1 | <0.1        | 1.3  | 1.9  | <0.5     | <0.1 | <0.1 | <0.1 |
| 63,56    | -12,72    | 93            | Lan  | 40   | 41          | <0.1 | <0.1     | 16   | 0.40 | <0.1        | <0.5 | <0.5 | <0.5     | 0.60 | 0.70 | <0.1 |
| 63,43    | -12,53    | 94            | Mýr  | 85   | 9.0         | <0.1 | <0.1     | 5.4  | 0.65 | <0.1        | <0.5 | <0.5 | <0.5     | <0.1 | <0.1 | <0.1 |
| 63,60    | -12,35    | 95            | Mýr  | 67   | 23          | <0.1 | <0.1     | 7.7  | 1.2  | <0.1        | <0.5 | 1.1  | <0.5     | <0.1 | <0.1 | <0.1 |

|       |        |     |             |           |           |            |             |             |               |              |      |      |      |      |               |               |
|-------|--------|-----|-------------|-----------|-----------|------------|-------------|-------------|---------------|--------------|------|------|------|------|---------------|---------------|
| 63,81 | -13,03 | 99  | Mýr         | 74        | 15        | <0.1       | <0.1        | 8.8         | 0.80          | <0.1         | <0.5 | 1.1  | <0.5 | <0.1 | <0.1          | <0.1          |
| 63,79 | -12,94 | 102 | Ska         | 67        | <0.1      | 11         | <0.1        | 13          | 1.8           | <0.1         | <0.5 | <0.5 | 1.2  | 1.2  | <0.1          | 4.4           |
| 63,82 | -12,89 | 103 | Mæl         | 80        | 11        | <0.1       | 7.5         | <0.1        | <0.1          | <0.1         | <0.5 | 1.1  | <0.5 | <0.1 | <0.1          | <0.1          |
| 63,68 | -13,78 | 104 | Mæl         | 78        | 15        | <0.1       | 6.1         | <0.1        | <0.1          | <0.1         | <0.5 | 0.86 | <0.5 | <0.1 | <0.1          | <0.1          |
| 63,67 | -13,93 | 105 | Mæl         | 84        | 11        | <0.1       | 5.1         | <0.1        | <0.1          | <0.1         | <0.5 | 0.80 | <0.5 | <0.1 | <0.1          | <0.1          |
| 64,46 | -14,30 | 106 | Hgv         | 10        | <0.1      | 52         | <0.1        | 31          | <0.1          | 6.2          | <0.5 | <0.5 | <0.5 | <0.1 | <0.1          | <0.1          |
| 64,45 | -14,31 | 107 | Hgv         | 28        | <0.1      | 43         | <0.1        | 25          | <0.1          | 4.0          | <0.5 | <0.5 | <0.5 | <0.1 | <0.1          | <0.1          |
| 64,46 | -14,86 | 108 | Hgv         | <0.1      | <0.1      | 65         | <0.1        | 31          | <0.1          | 3.9          | 0.5  | <0.5 | <0.5 | <0.1 | <0.1          | <0.1          |
|       |        |     | Av.l.<br>C. | 68±<br>26 | 15±<br>11 | 7.4±<br>19 | 1.4±3.<br>4 | 8.6±<br>9.0 | 0.21±<br>0.47 | 0.61<br>±1.7 | <0.5 | <0.5 | <0.5 | <0.1 | 0.11±<br>0.28 | 0.19±<br>0.92 |

64  
65  
66  
67  
68  
69  
70  
71  
72  
73  
74  
75

76 **Table S4.** Fe mode of occurrence of different samples along the Jökulsá á Fjöllum basin. R.S.C is the Random  
 77 Sampling Composite sample, obtained after mixing an equal batch of each type of sample. The contents are in  
 78 %wt for total Fe (FeT) and in % of FeT for the respective forms of occurrence. FeA: content of readily  
 79 exchangeable Fe, FeD: Fe content from hematite, goethite and pyrite, FeM: Fe content from magnetite, FeS: Fe  
 80 content from non Fe minerals as Fe-silicates and volcanic glass. \*Median Fe mode of occurrence extracted from  
 81 **González-Romero et al. (2023).**

| Latitude | Longitude | Sample number | Type of sample | FeT (%wt) | FeA (% FeT) | FeD (% FeT) | FeM (% FeT) | FeS (% FeT) |
|----------|-----------|---------------|----------------|-----------|-------------|-------------|-------------|-------------|
| 64,91    | -16,78    | 1             | C              | 9.2       | 2.2         | 7.7         | 25          | 65          |
| 64,91    | -16,78    | 2             | C              | 9.7       | 0.75        | 1.4         | 12          | 86          |
| 64,84    | -16,98    | 9             | C              | 8.9       | 1.4         | 1.8         | 23          | 74          |
| 64,89    | -16,88    | 12            | C              | 9.6       | 0.79        | 2.2         | 14          | 83          |
| 64,91    | -16,83    | 14            | C              | 9.4       | 0.79        | 2.8         | 14          | 82          |
| 64,91    | -16,77    | 15            | C              | 9.4       | 1.3         | 3.8         | 22          | 73          |
| 65,23    | -16,19    | 26            | C              | 9.4       | 0.97        | 3.1         | 9.9         | 86          |
| 65,26    | -16,12    | 27            | C              | 10.1      | 1.1         | 3.4         | 8.7         | 87          |
| 64,91    | -16,77    | 29            | C              | 9.3       | 1.2         | 4.5         | 19          | 75          |
| 64,91    | -16,77    | 30            | C              | 9.3       | 1.6         | 4.4         | 23          | 71          |
| 64,91    | -16,77    | 31            | C              | 9.2       | 1.1         | 3.1         | 17          | 79          |
| 66,03    | -16,44    | 109           | C              | 10.2      | 1.7         | 3.1         | 11          | 84          |
| 66,09    | -16,48    | 110           | C              | 9.5       | 1.6         | 3.7         | 12          | 83          |
| 66,18    | -16,51    | 111           | C              | 10.2      | 1.6         | 4.5         | 11          | 83          |
| 64,92    | -16,78    | R.S.C         | C              | 9.0       | 1.3         | 2.9         | 19          | 77          |
| 64,91    | -16,78    | 3             | S              | 9.5       | 1.9         | 5.4         | 22          | 71          |
| 64,89    | -16,88    | 13            | S              | 8.9       | 1.5         | 1.5         | 27          | 70          |
| 64,91    | -16,77    | 16            | S              | 9.8       | 0.84        | 1.2         | 13          | 85          |
| 65,23    | -16,19    | 25            | S              | 10.1      | 1.1         | 1.9         | 11          | 86          |
| 65,26    | -16,12    | 28            | S              | 9.3       | 1.8         | 2.9         | 14          | 81          |
| 64,91    | -16,77    | 32            | S              | 9.7       | 0.83        | 1.3         | 0.42        | 97          |
| 64,91    | -16,77    | 33            | S              | 9.6       | 0.92        | 1.7         | 14          | 84          |
| 64,92    | -16,78    | R.S.C         | S              | 8.9       | 1.0         | 1.7         | 16          | 81          |
| 64,83    | -17,01    | 4             | R              | 9.7       | 0.88        | 1.6         | 21          | 77          |
| 64,83    | -17,01    | 6             | R              | 9.7       | 0.90        | 1.8         | 14          | 83          |

|       |        |    |                  |              |               |              |        |        |
|-------|--------|----|------------------|--------------|---------------|--------------|--------|--------|
| 64,84 | -16,98 | 10 | R                | 9.7          | 0.69          | 0.64         | 17     | 82     |
| 64,86 | -16,95 | 11 | R                | 9.6          | 0.69          | 0.73         | 18     | 81     |
| 64,91 | -16,77 | 17 | R                | 8.8          | 1.0           | 1.3          | 21     | 77     |
| 64,92 | -16,76 | 18 | R                | 9.6          | 0.72          | 1.0          | 16     | 83     |
| 64,95 | -16,55 | 19 | R                | 9.1          | 0.64          | 0.95         | 18     | 80     |
| 64,91 | -16,77 | 34 | R                | 8.8          | 1.3           | 1.3          | 16     | 81     |
|       |        |    | Average crust    | 9.5±0.3<br>9 | 1.3±0.3<br>9  | 3.5±1.5      | 16±5.4 | 79±6.5 |
|       |        |    | Average sediment | 9.5±0.4<br>3 | 1.2±0.4<br>4  | 2.2±1.4      | 15±7.8 | 82±8.7 |
|       |        |    | Average ripples  | 9.4±0.4<br>1 | 0.85±0.<br>22 | 1.2±0.4<br>1 | 18±2.4 | 80±2.4 |

82

83

84

85

86

87

88

89

90

91

92

93

94

95

96

97

98

99

100



101 **Table S5.** Fe mode of occurrence from different locations (Loc.) Dyngjusandur (Dyn), Dyngjuvatn (Dvt),  
 102 Landeyjarsandur (Lan), Mýrdalssandur (Mýr), Skaftarsandur (Ska), Mælifellsandur (Mæl) and Hagavatn (Hgv),  
 103 Average icelandic crust (Av.I.C.). The value of every mode of occurrence is in % of total Fe content. FeA: content  
 104 of readily exchangeable Fe, FeD: Fe content from hematite, goethite and pyrite, FeM: Fe content from  
 105 magnetite, FeS: Fe content from non Fe minerals as Fe-silicates and volcanic glass. The contents are in %wt for  
 106 FeT and as % of FeT for the respective forms of occurrence.

| Latitude | Longitude | Sample number |         | FeT (%wt) | FeA (% FeT) | FeD (% FeT) | FeM (% FeT) | FeS (% FeT) |
|----------|-----------|---------------|---------|-----------|-------------|-------------|-------------|-------------|
| 64,92    | -16,78    | R.S.C.        | Dyn     | 9.2       | 2.2         | 7.7         | 25          | 65          |
| 64,91    | -16,78    | 1             | Dyn     | 9.7       | 0.75        | 1.4         | 12          | 86          |
| 64,91    | -16,78    | 2             | Dyn     | 9.6       | 0.79        | 2.2         | 14          | 83          |
| 64,89    | -16,88    | 12            | Dyn     | 9.4       | 0.79        | 2.8         | 14          | 82          |
| 64,91    | -16,83    | 14            | Dyn     | 9.4       | 1.3         | 3.8         | 22          | 73          |
| 64,91    | -16,77    | 15            | Dyn     | 9.0       | 1.3         | 2.9         | 19          | 77          |
| 64,91    | -16,77    | 29            | Dyn     | 9.3       | 1.2         | 4.5         | 19          | 75          |
| 64,91    | -16,77    | 30            | Dyn     | 9.3       | 1.6         | 4.4         | 23          | 71          |
| 64,91    | -16,77    | 31            | Dyn     | 9.2       | 1.1         | 3.1         | 17          | 79          |
| 64,98    | -16,57    | 20            | Dvt     | 9.1       | 1.7         | 3.4         | 13          | 82          |
| 65,00    | -16,55    | 21            | Dvt     | 5.5       | 2.6         | 11          | 7.6         | 79          |
| 63,53    | -12,67    | 92            | Lan     | 9.3       | 1.4         | 5.8         | 7.2         | 86          |
| 63,56    | -12,72    | 93            | Lan     | 8.5       | 2.3         | 8.7         | 12          | 77          |
| 63,43    | -12,53    | 94            | Mýr     | 10.7      | 1.4         | 2.4         | 18          | 78          |
| 63,60    | -12,35    | 95            | Mýr     | 10.0      | 1.8         | 4.8         | 15          | 78          |
| 63,81    | -13,03    | 99            | Mýr     | 10.8      | 1.1         | 2.5         | 14          | 82          |
| 63,79    | -12,94    | 102           | Ska     | 9.4       | 2.6         | 4.4         | 13          | 80          |
| 63,82    | -12,89    | 103           | Mæl     | 11.6      | 0.88        | 2.4         | 7.8         | 89          |
| 63,68    | -13,78    | 104           | Mæl     | 10.7      | 1.3         | 2.8         | 15          | 81          |
| 63,67    | -13,93    | 105           | Mæl     | 11.3      | 1.8         | 3.9         | 14          | 80          |
| 64,46    | -14,30    | 106           | Hgv     | 8.1       | 1.6         | 8.0         | 10          | 80          |
| 64,45    | -14,31    | 107           | Hgv     | 8.3       | 3.1         | 12          | 9.4         | 76          |
| 64,46    | -14,86    | 108           | Hgv     | 5.6       | 3.4         | 11          | 14          | 71          |
|          |           |               | Av.I.C. | 9.3±1.5   | 1.6±0.74    | 5.0±3.1     | 15±4.8      | 79±5.4      |
